# Supplementary material
Source: Elsevier journal article supplement (https://www.sciencedirect.com/science/article/pii/S0300893224002744)

**SUPPLEMENTARY DATA**

**Table 1 of the supplementary data.** Clinical characteristics according to treatment after excluding

| Variables          | SGLT2i     | GLP1ra     | Both       | P      |
|--------------------|------------|------------|------------|--------|
| No.                | 10 444     | 946        | 2266       |        |
| Age                | 69 [61-77] | 66 [57-74] | 64 [56-72] | < .001 |
| Sex (male)         | 6264/60.0  | 441/46.6   | 1282/56.6  | < .001 |
| HBP                | 7287/69.8  | 698/73.8   | 1688/74.5  | < .001 |
| Obesity/overweight | 4533/43.4  | 946/100    | 2266/100   | < .001 |
| DLP                | 6273/60.1  | 502/53.1   | 1413/62.4  | < .001 |
| DM                 | 10 444/100 | 946/100    | 2266/100   | < .001 |
| CAD                | 1475/14.1  | 114/12.1   | 344/15.2   | .067   |
| HF                 | 654/6.3    | 63/6.7     | 144/6.4    | .885   |
| AF                 | 1065/10.2  | 69/7.3     | 198/8.7    | .003   |
| Stroke             | 550/5.3    | 64/6.8     | 119/5.3    | .142   |
| PAD                | 503/4.8    | 66/7.0     | 139/6.1    | .001   |

patients without diabetes and those who died of noncancer causes

GLP1ra, glucagon-like peptide 1 receptor agonists; SGLT2i, sodium-glucose cotransporter 2 inhibitors; HBP, high blood pressure; DM, diabetes mellitus; DLP, dyslipidemia; HF, heart failure; AF, atrial fibrillation; CAD, coronary artery disease; PAD, peripheral artery disease.

The data are expressed as No./% or median [interquartile range].

**Table 2 of the supplementary data.** Multivariate Cox regression analysis. Hospitalization or Cancer mortality

| Variable           | Hospitalization for cancer |          |          |     | Cancer mortality |          |          |        |
|--------------------|----------------------------|----------|----------|-----|------------------|----------|----------|--------|
|                    | HR                         | Lower CI | Upper CI | P   | HR               | Lower CI | Upper CI | P      |
| Both vs SGLT2i     | 0.82                       | 0.59     | 1.15     | .25 | 0.21             | 0.10     | 0.43     | 0.01   |
| Both vs GLP1ra     | 0.68                       | 0.42     | 1.09     | .11 | 0.18             | 0.07     | 0.49     | < .001 |
| Treatment duration | 0.99                       | 0.99     | 1.00     | .23 | 0.96             | 0.95     | 0.98     | < .001 |
| Sex (male)         | 1.40                       | 0.95     | 2.06     | .09 | 2.59             | 1.33     | 5.03     | .01    |
| Obesity            | 1.29                       | 0.91     | 1.83     | .15 | 1.48             | 0.76     | 2.87     | .25    |
| HBP                | 1.28                       | 0.82     | 1.99     | .27 | 1.27             | 0.54     | 3.00     | .58    |
| DLP                | 0.87                       | 0.62     | 1.23     | .44 | 0.69             | 0.38     | 1.27     | .23    |
| DM                 | 1.34                       | 0.84     | 2.16     | .22 | 1.88             | 0.79     | 4.45     | .15    |
| CAD                | 0.79                       | 0.43     | 1.45     | .45 | 0.55             | 0.19     | 1.58     | .27    |
| HF                 | 1.24                       | 0.69     | 2.23     | .46 | 1.34             | 0.43     | 4.15     | .61    |
| AF                 | 1.21                       | 0.65     | 2.25     | .55 | 1.41             | 0.48     | 4.14     | .53    |
| Stroke             | 1.03                       | 1.01     | 1.05     | .00 | 1.06             | 1.03     | 1.09     | < .001 |
| Age                | 1.22                       | 0.87     | 1.70     | .25 | 4.71             | 2.29     | 9.69     | < .001 |

CVD, cardiovascular disease; GLP1ra, glucagon-like peptide 1 receptor agonists; SGLT2i, sodium-glucose cotransporter 2 inhibitors; HR, hazard ratio; CI, confidence interval; HBP, high blood pressure; DM, diabetes mellitus; DLP, dyslipidemia; HF, heart failure; AF, atrial fibrillation; CAD, coronary artery disease; PAD, peripheral artery disease.

Figure1 of the supplementary data. Love plot displays standardized mean differences for all the covariates in the population before (unadjusted) and after adjustment by multinomial propensity score.

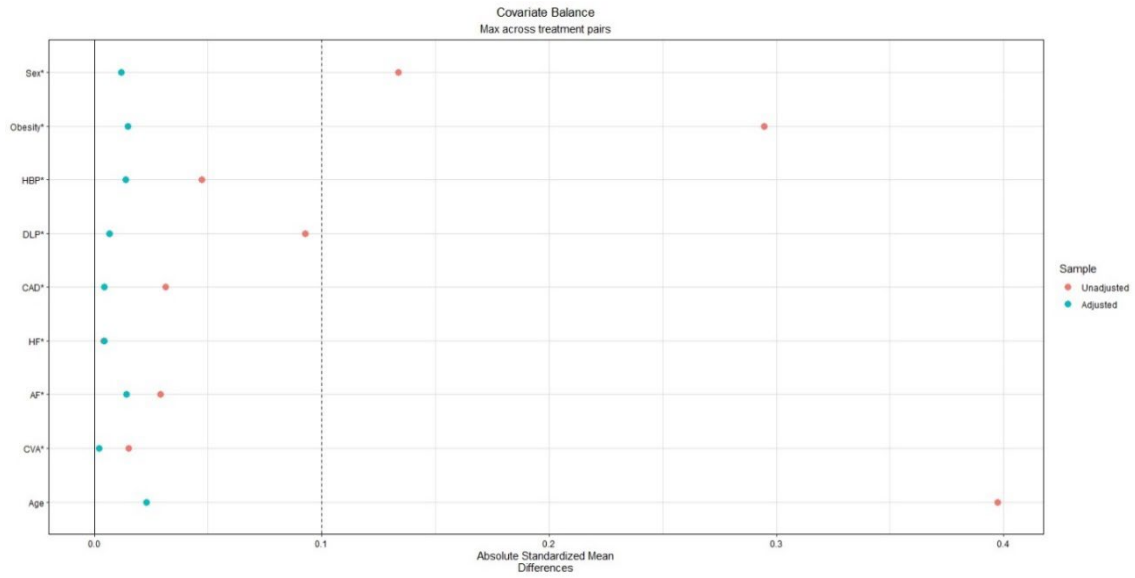

**Figure 2 of the supplementary data.** Cox regression survival curve of SGLT2i, GLP1ra, and combined therapy groups for hospitalization for cancer (A) and cancer mortality (B)

**A**

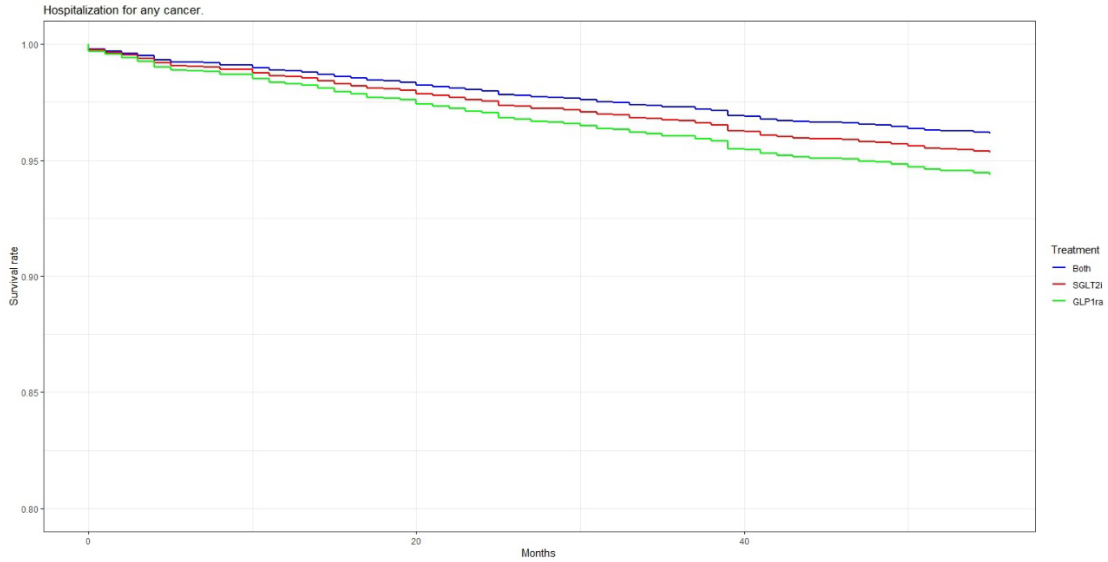

**B**

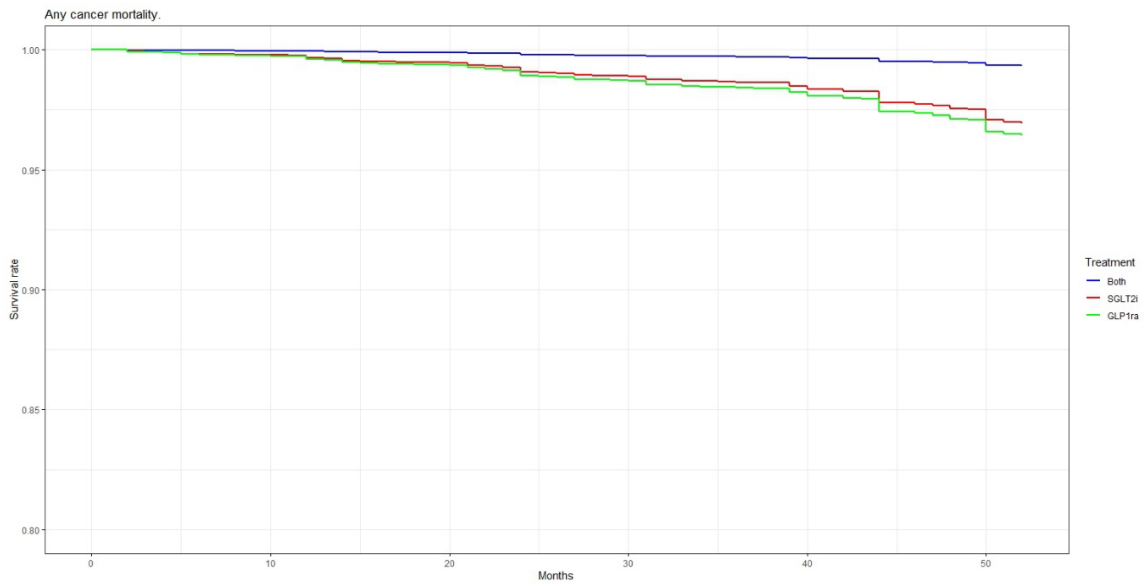

Figure 3 of the supplementary data. Proportional hazard assumptions graphs for hospitalization for

cancer (A) and cancer mortality (B)

A

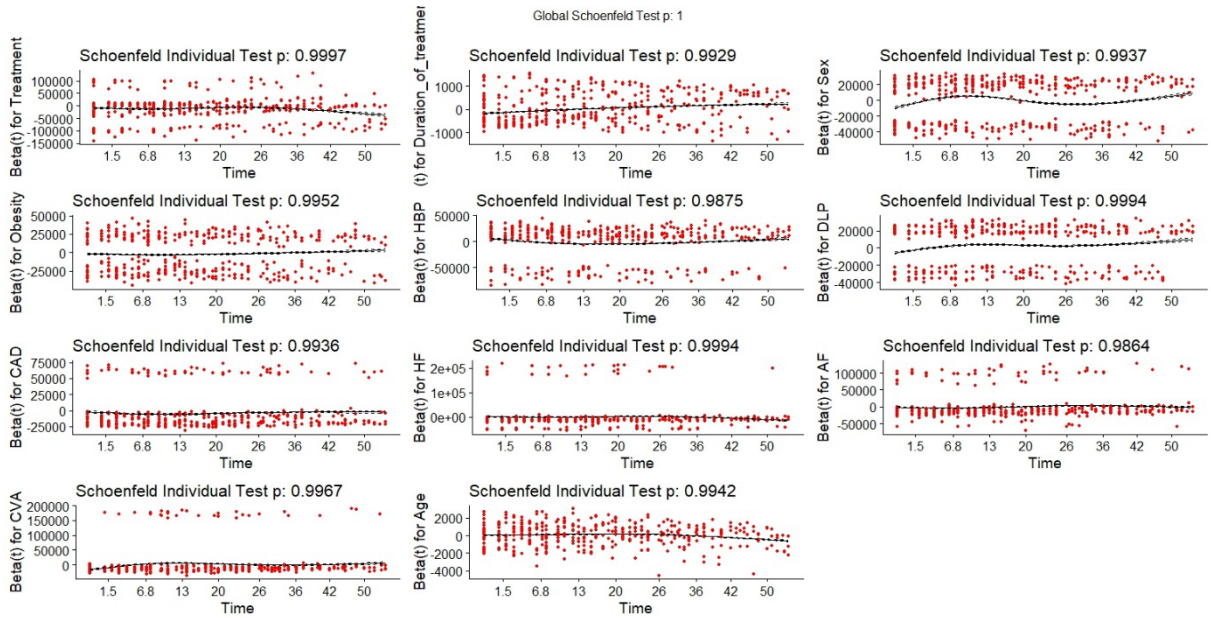

B

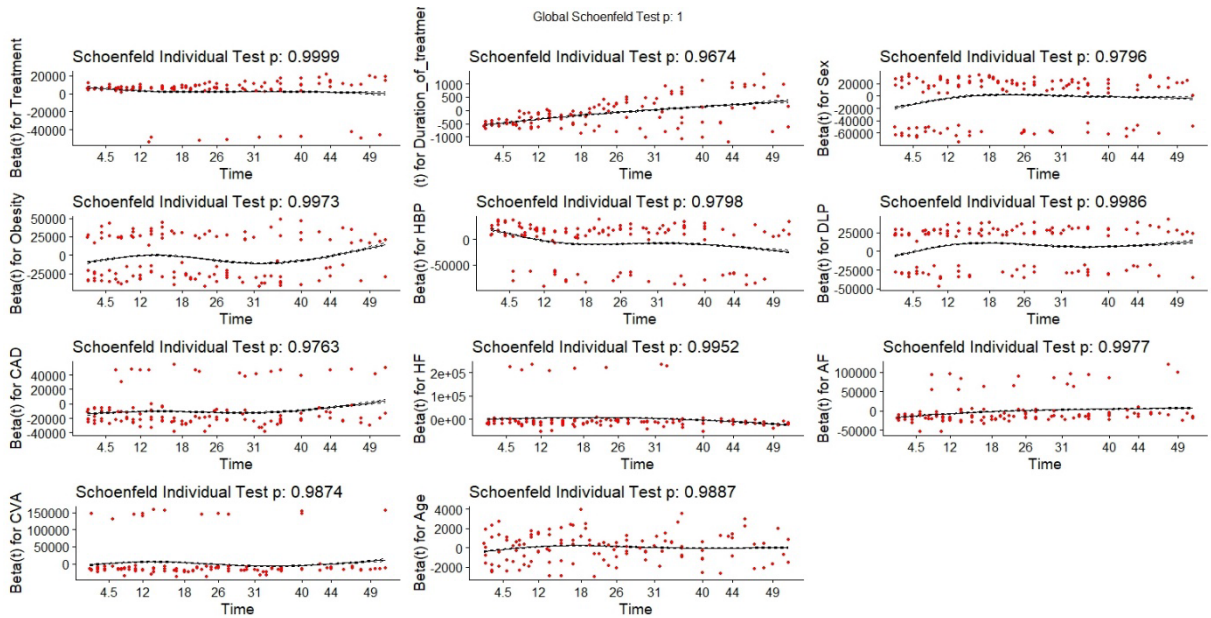

Supplement: mmc1 [file mmc1.pdf]
